# Supplementary material for: Bace1-dependent amyloid processing regulates hypothalamic leptin sensitivity in obese mice
Source: PubMed Central journal article supplement (PMC5758523; doi:10.1038/s41598-017-18388-6), 2018-01-08
Supplement: 41598_2017_18388_MOESM1_ESM.pdf [file 41598_2017_18388_MOESM1_ESM.pdf]

# **Bace1-dependent amyloid processing regulates hypothalamic leptin sensitivity in obese mice**

Paul J. Meakin<sup>1</sup>, Susan M. Jaliczy<sup>1</sup>, Gemma Montagut<sup>1</sup>, David J.P. Allsop<sup>1</sup>, Daniella L. Cavellini<sup>1</sup>, Stuart W. Irvine<sup>1</sup>, Christopher McGinley, Mary K Liddell<sup>1</sup>, Alison D McNeilly<sup>1</sup>, Karolina Parmionova<sup>1</sup>, Yu-Ru Liu<sup>2</sup>, Charlotte L. S. Bailey<sup>2</sup>, J. Kim Dale<sup>2</sup>, Lora K Heisler<sup>3</sup>, Rory J McCrimmon<sup>1</sup> & Michael L. J. Ashford<sup>1\*</sup>

<sup>1</sup>Division of Molecular and Clinical Medicine, School of Medicine, Ninewells Hospital & Medical School, Dundee DD1 9SY, UK.

<sup>2</sup>School of Life Sciences, University of Dundee, Dundee DD1 5EH, UK

<sup>3</sup>Rowett Institute of Nutrition and Health, Aberdeen AB21 9SB, UK

\*Correspondence:

Michael LJ Ashford

Division of Molecular and Clinical Medicine

School of Medicine, University of Dundee

Ninewells Hospital & Medical School

Dundee DD1 9SY

Tel: +44 1382 383095

Email: [m.l.j.ashford@dundee.ac.uk](mailto:m.l.j.ashford@dundee.ac.uk)

**Supplementary Table 1. qRT-PCR probes and primers used in the study**

| <b>Probe Name</b> | <b>Code</b>    |
|-------------------|----------------|
| Actin             | 4352933E       |
| AgRP              | Mm004475829_g1 |
| Atf4              | Mm00515325_g1  |
| Atf6              | Mm01295319_m1  |
| Bace1             | Mm00478664_m1  |
| Cartpt            | Mm0048906_m1   |
| Crh               | Mm01293920_s1  |
| Ddit3             | Mm01135937_g1  |
| Gadd34            | Mm01205601_g1  |
| Hcrt              | Mm0196403_s1   |
| Hspa5             | Mm00517690_g1  |
| Lepr              | Mm00440181_m1  |
| Mc4r              | Mm00457483_s1  |
| NPY               | Mm03048253_m1  |
| Pmch              | Mm01242886_g1  |
| POMC              | Mm00435874_m1  |
| PTP1B             | Mm00448431_m1  |
| SOCS3             | Mm00545913_s1  |
| Trh               | Mm01963590_s1  |

**Supplementary Table 2. Primary and Secondary antibodies used in the study**

| <b>Primary Antibody</b> | <b>Species</b> | <b>Dilution</b>            | <b>Source</b>                       |
|-------------------------|----------------|----------------------------|-------------------------------------|
| Bace1                   | Rabbit         | 1:250 (IHC)<br>1:1000 (IB) | Sigma Aldrich<br>(B0681)            |
| NeuN                    | Guinea-Pig     | 1:500 (IHC)                | Millipore<br>(ABN90P)               |
| LEPR-B                  | Sheep          | 1:100 (IHC)                | In-house                            |
| pSTAT3<br>(Tyr 705)     | Rabbit         | 1:1000 (IB)<br>1:500 (IB)  | Cell Signalling<br>(9131)           |
| STAT3                   | Mouse          | 1:1000 (IB)                | Cell Signalling<br>(9139)           |
| GFP                     | Mouse          | 1:200 (IHC)                | Abcam<br>(ab291)                    |
| GFP                     | Chicken        | 1:200 (IHC)                | Abcam<br>(ab13970)                  |
| GFAP                    | Chicken        | 1:500 (IHC)                | Millipore<br>(AB5541)               |
| Actin                   | Rabbit         | 1:5000 (IB)                | Sigma Aldrich<br>(A2066)            |
| PTP1B                   | Rabbit         | 1:1000 (IB)                | Dr M Delibegovic<br>(U of Aberdeen) |
| Mitofusin 1             | Mouse          | 1:1000 (IB)                | Abcam<br>(ab126575)                 |
| Mitofusin 2             | Mouse          | 1:1000 (IB)                | Abcam<br>(ab56889)                  |
| p-EIF2 $\alpha$         | Rabbit         | 1:1000 (IB)                | Cell Signalling<br>(3398)           |
| EIF2 $\alpha$           | Rabbit         | 1:1000 (IB)                | Cell Signalling<br>(5324)           |
| SOCS3                   | Rabbit         | 1:1000 (IB)                | Cell Signalling<br>(2923)           |
| p-IRE1                  | Rabbit         | 1:1000 (IB)                | Abcam<br>(ab48187)                  |
| IRE1                    | Rabbit         | 1:1000 (IB)                | Abcam<br>(ab37073)                  |
| CHOP                    | Rabbit         | 1:1000 (IB)                | Cell Signalling<br>(5554)           |

| <b>Secondary Antibody</b> | <b>Dilution</b> | <b>Source</b>          |
|---------------------------|-----------------|------------------------|
| Alexa 488                 | 1:500 (IHC)     | Life Technologies      |
| Alexa 647                 | 1:500 (IHC)     | Life Technologies      |
| Cy3                       | 1:250 (IHC)     | Jackson ImmunoResearch |

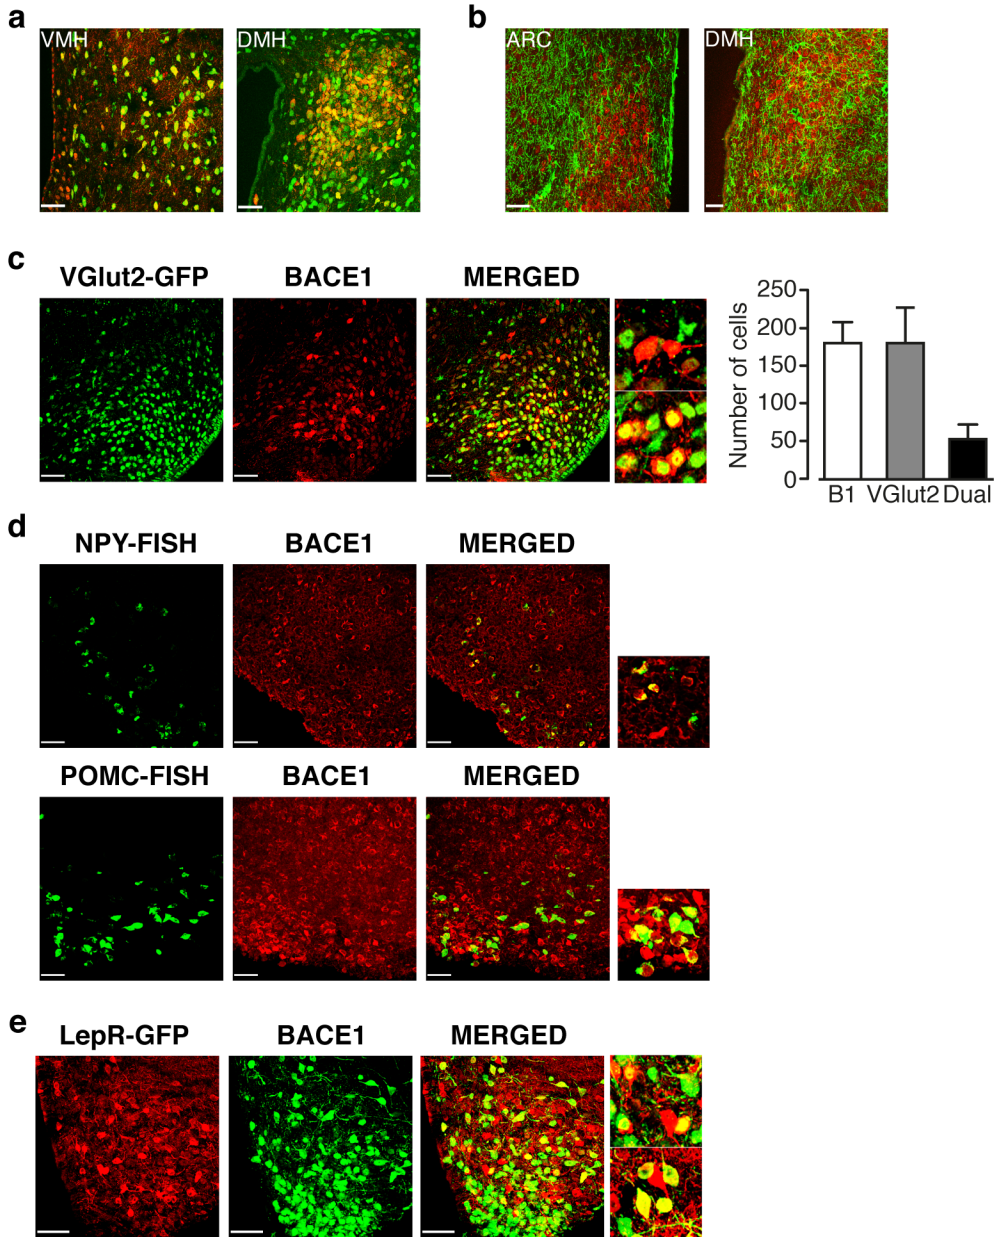

### Supplementary Figure 1. Hypothalamic neuronal expression of Bace1.

(a) Representative photomicrograph of VMH and DMH Bace1 (red) and NeuN (green) immunoreactivity showing co-localisation. Bar, 50  $\mu$ m. (b) Representative photomicrograph of ARC and DMH Bace1 and GFAP immunoreactivity showing absence of co-localisation. Bar, 50  $\mu$ m. (c) Bace1 immunoreactivity in ARC of VGlu2-GFP mice, with merged images (with inset higher magnification) showing dual-label immunofluorescence. Bars, 50  $\mu$ m. (d) Representative photomicrographs of Bace1 immunoreactivity and POMC and NPY mRNA fluorescent in situ hybridization. Bar 50  $\mu$ m. (e) Bace1 immunoreactivity in ARC of LepR-GFP mice, with merged images showing dual-label immunofluorescence. Bars, 50  $\mu$ m. Bar graph (c) shows number of cells singly- and dual-labelled from 3 different mice.

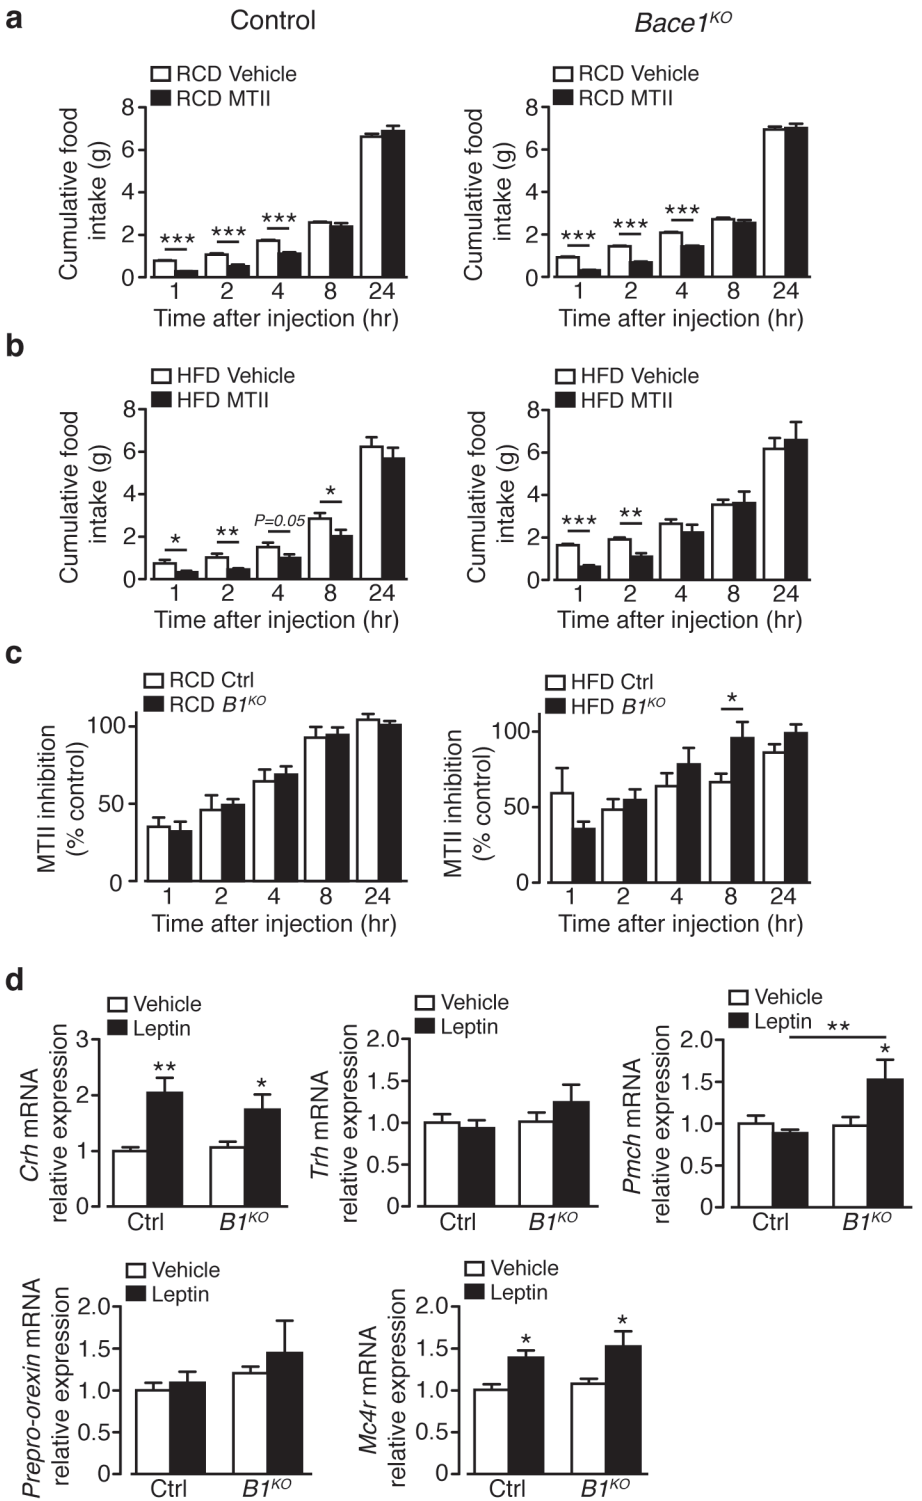

**Supplementary Figure 2. Melanotan II-mediated hypophagia and neuropeptide expression of second order hypothalamic neurons is unaltered in *Bace1<sup>KO</sup>* mice.** Cumulative food intake at the times indicated after injection of vehicle or MTII following an overnight fast in (a) RCD control and *Bace1<sup>KO</sup>* mice ( $n = 7/\text{group}$ ) and (b) HFD (20 weeks) control and *Bace1<sup>KO</sup>* mice ( $n = 7/\text{group}$ ). (c) Relative inhibition of feeding by MTII at the times indicated after injection in RCD and HFD control and *Bace1<sup>KO</sup>* mice (d) RT-qPCR analysis of *Crh*, *Trh*, *Pmch*, Prepro-orexin and *Mc4r* from vehicle or leptin-treated RCD control and *Bace1<sup>KO</sup>* mice ( $n = 7 - 9/\text{group}$ ). Data normalized to vehicle treated control mice. Data are means  $\pm$  SEM. \*  $P < 0.05$ , \*\*  $P < 0.01$ , \*\*\*  $P < 0.001$  by one-way ANOVA with Bonferroni's multiple comparisons test (a – c) or Kruskal-Wallis test (d).

**a**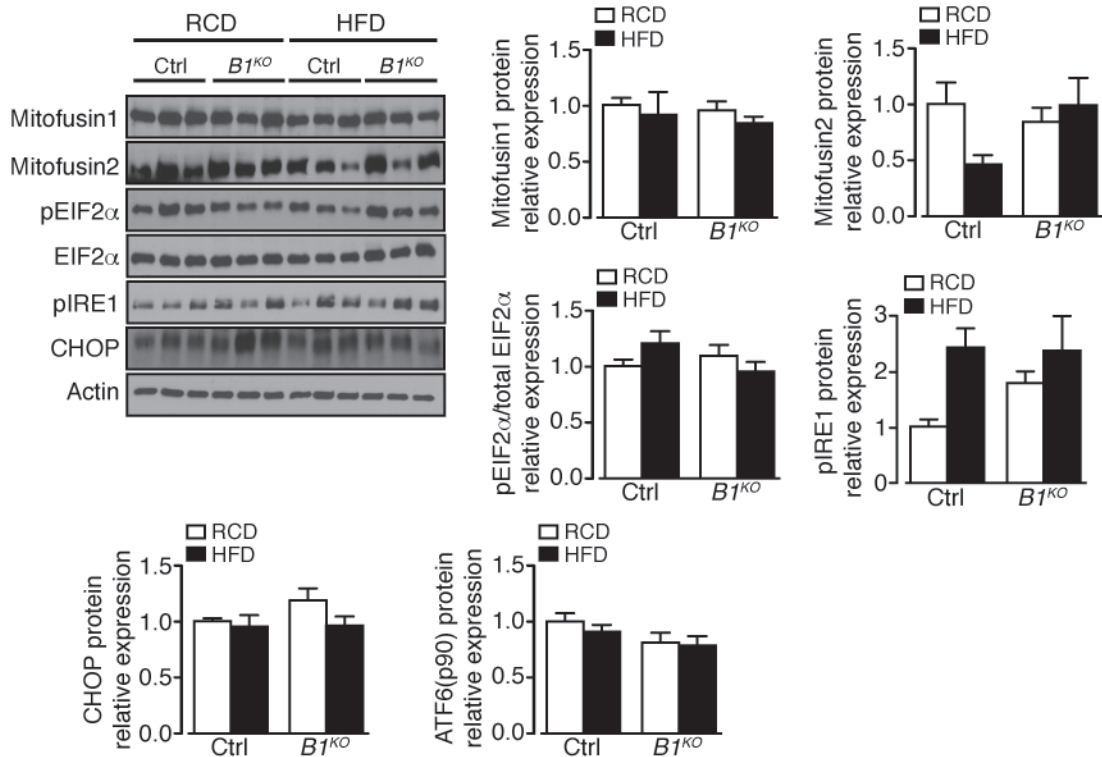**b**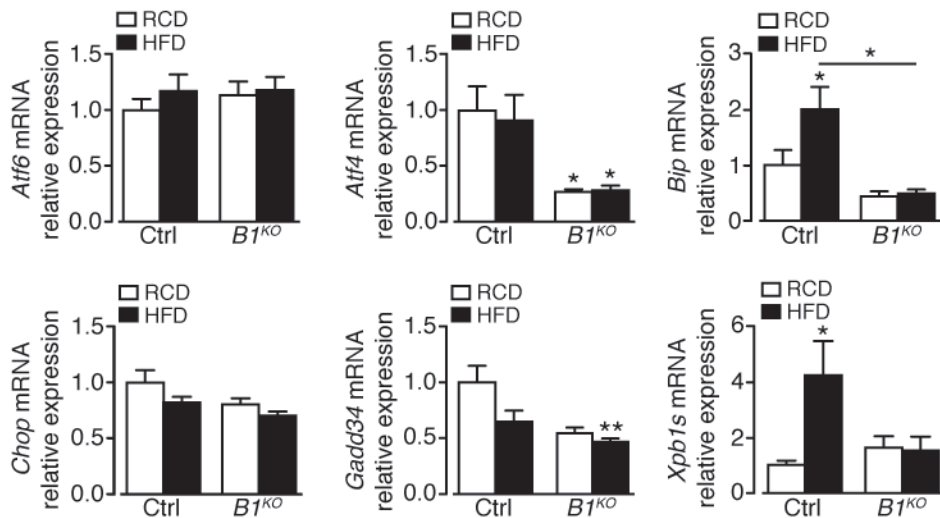

### Supplementary Figure 3. Effect of lack of *Bace1* on hypothalamic ER stress markers.

(a) Immunoblots of mitofusin1, mitofusin2, pEIF2 $\alpha$  & EIF2 $\alpha$ , pIRE1, CHOP and actin in BMH of control and *Bace1<sup>KO</sup>* mice on RCD and HFD. The quantified signal intensity of each protein is shown ( $n = 6 - 9$ /group). (b) RT-qPCR analysis of BMH *Atf6*, *Atf4*, *Bip*, *Chop*, *Gadd34*, and *Xbp1s* from RCD and HFD control and *Bace1<sup>KO</sup>* mice ( $n = 6 - 9$ /group). In each case data are normalized to RCD controls. Data are means  $\pm$  SEM. \*  $P < 0.05$ , \*\*  $P < 0.01$  by Kruskal-Wallis test. Uncropped images of immunoblots can be found in Supplementary Fig. 12.

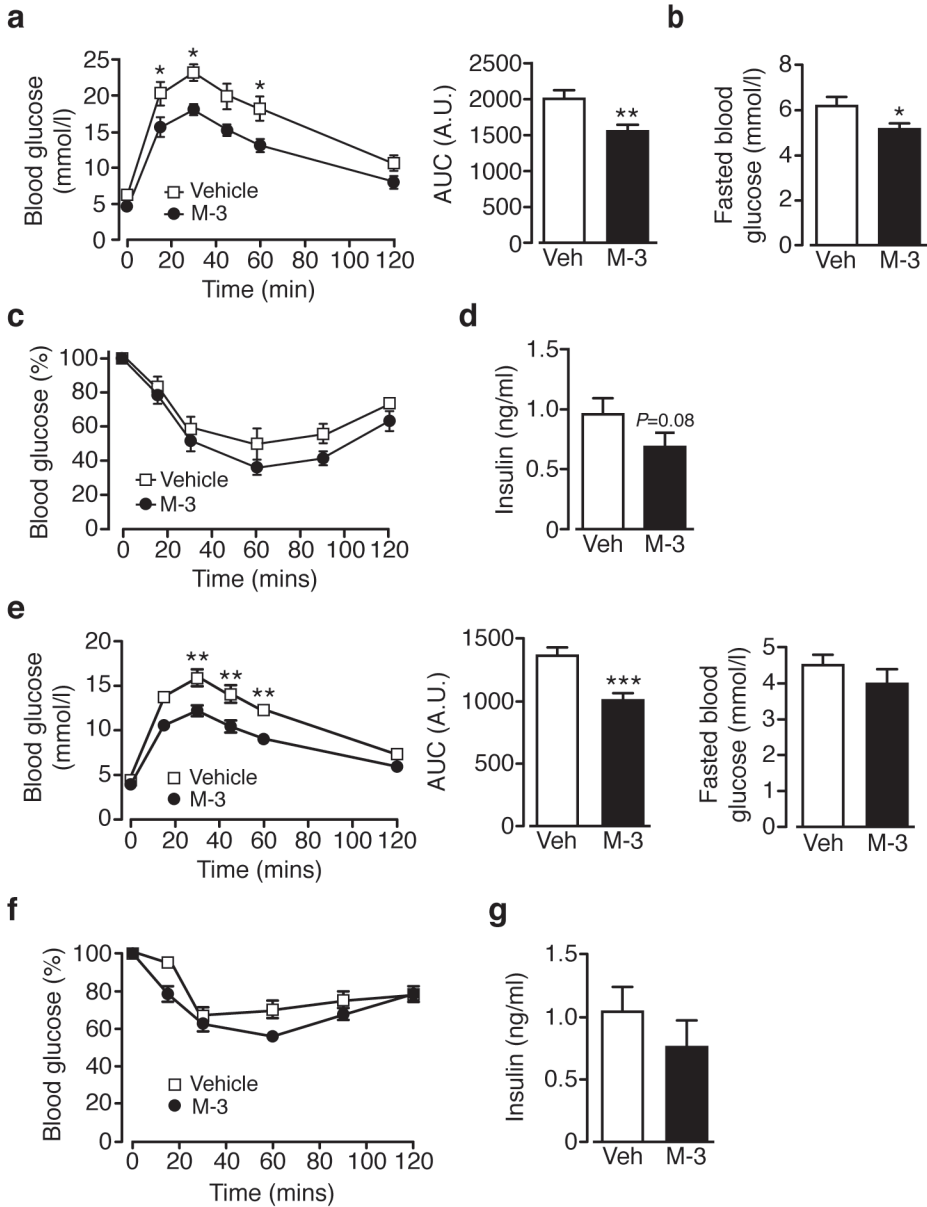

### Supplementary Figure 4. Peripheral or central administration of Bace1 inhibitor improves glucose homeostasis in DIO mice.

(a,b) Glucose tolerance (with AUC) after 14 days sc M-3 (a) and fasted glucose (b) after 24 days M-3 in DIO mice ( $n = 9/\text{group}$ ). (c,d) Insulin sensitivity (c) and fasted serum insulin (d) levels after 24 days sc M-3 in DIO mice ( $n = 7 - 10/\text{group}$ ). (e) Glucose tolerance (with AUC) after 14 days icv M-3 ( $n = 11/\text{group}$ ). (f,g) Insulin sensitivity (f) and fasted serum insulin (g) levels after 14 days icv M-3 in DIO mice ( $n = 11 - 14/\text{group}$ ). Data are means  $\pm$  SEM. \*  $P < 0.05$ , \*\*  $P < 0.01$ , \*\*\*  $P < 0.001$  by repeated measures ANOVA with Sidak's multiple comparisons test (a,c,e,f) or 2-tailed unpaired Student's t-test (b,e,g and AUC in a,e)

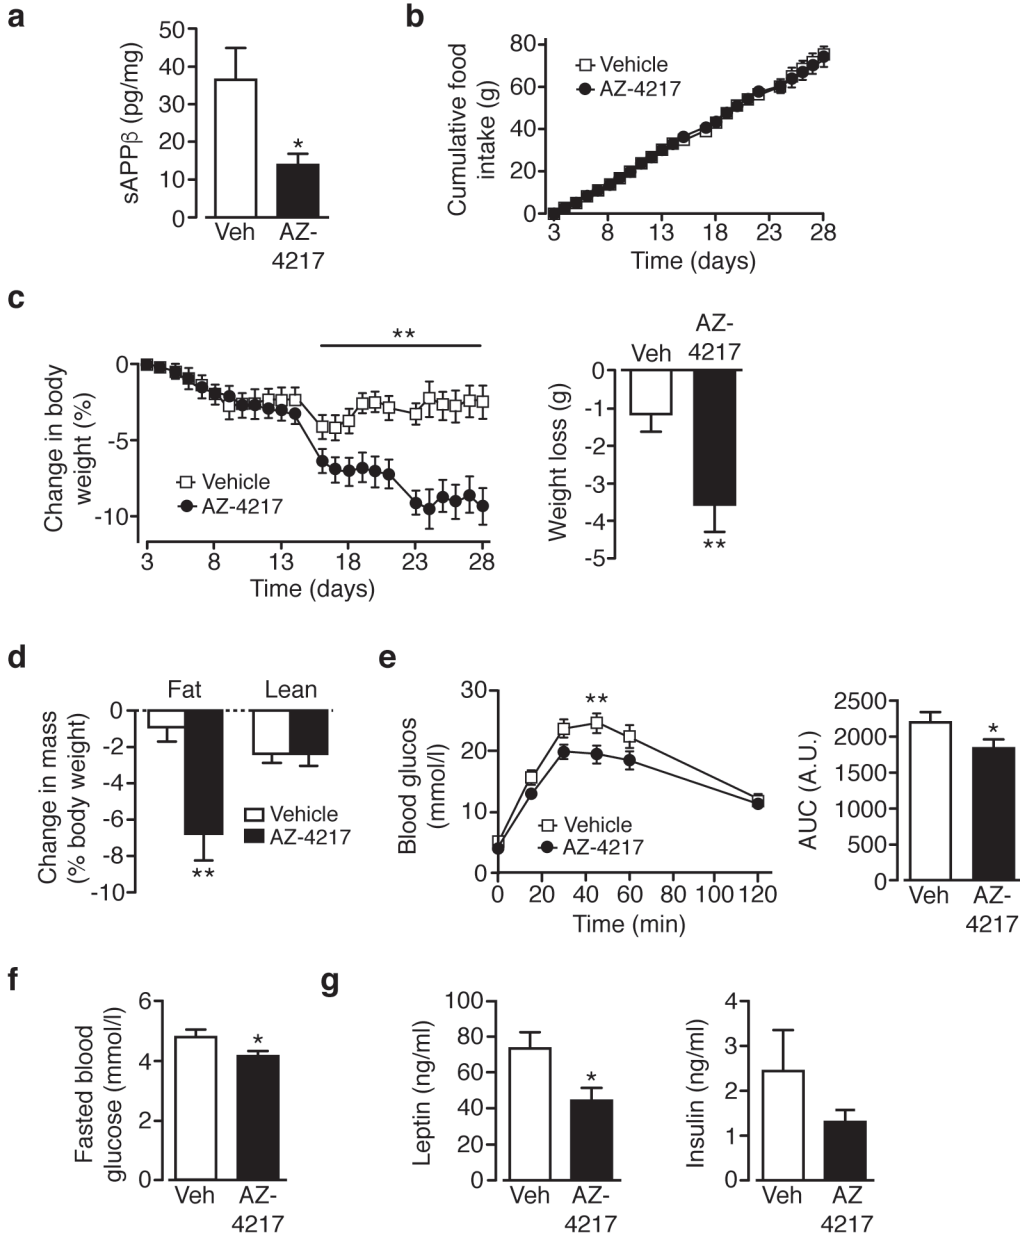

### Supplementary Figure 5. Oral administration of AZ-4217 improves metabolic phenotype of DIO mice.

(a) BMH Bace1 activity in vehicle ( $n = 9$ ) or AZ-4217 treated DIO mice ( $n = 10$ ). (b) Cumulative food intake of age-matched DIO mice treated with vehicle ( $n = 9$ ) or AZ-4217 ( $n = 10$ ). (c) Percentage decrease in body weight and actual body weight loss in age-matched DIO mice treated with vehicle ( $n = 9$ ) or AZ-4217 ( $n = 10$ ). (d) qMR scans showing fat and lean mass in DIO mice treated with vehicle ( $n = 9$ ) or AZ-4217 ( $n = 10$ ) for 28 days. (e) Glucose tolerance (with AUC) after 14 days and (f) fasted plasma glucose levels after 24 days, vehicle ( $n = 9$ ) or AZ-4217 ( $n = 10$ ) in DIO mice. (g) Plasma leptin and insulin levels after 28 days treatment with vehicle ( $n = 9$ ) or AZ-4217 ( $n = 10$ ) in DIO mice. Data are means  $\pm$  SEM. \*  $P < 0.05$ , \*\*  $P < 0.01$  by repeated measures ANOVA with Sidak's multiple comparisons test (b,c,e). 1-way ANOVA with Bonferroni's multiple comparisons test (d) or 2-tailed unpaired Student's t-test (a,f,g, Body weight loss in c and AUC in e).



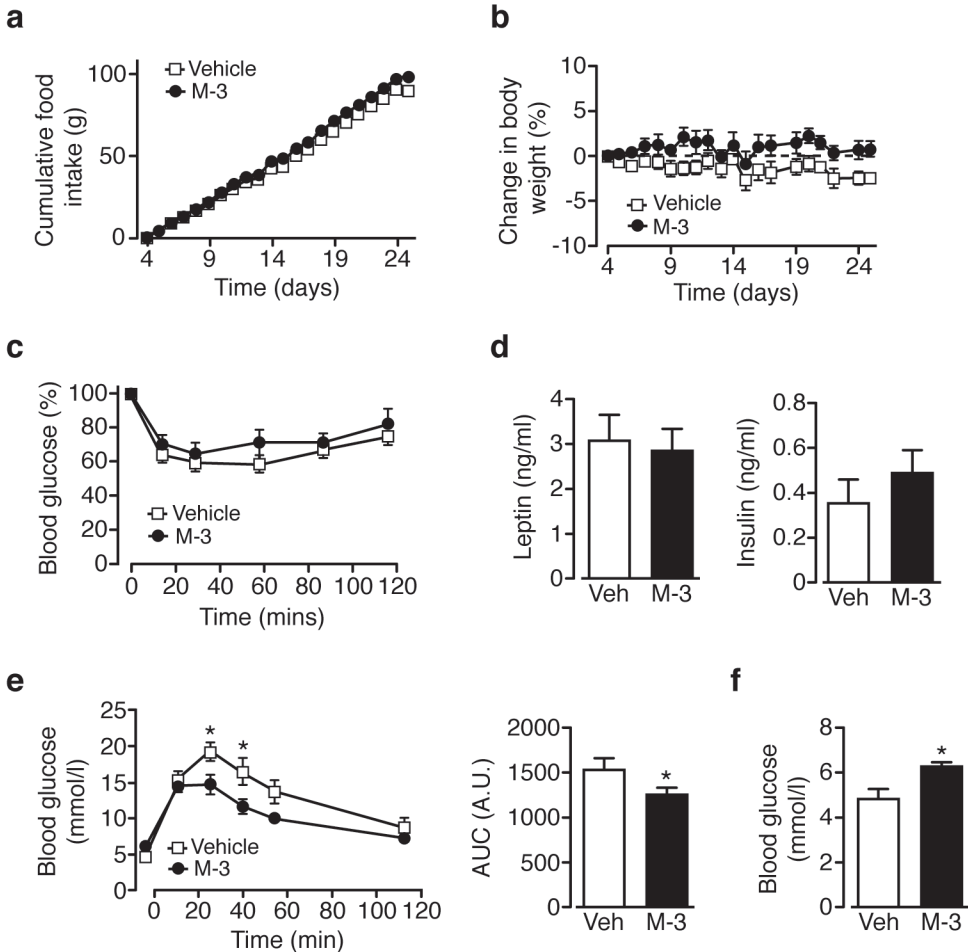

**Supplementary Figure 6. M-3 has minor effects on the metabolic phenotype of lean mice.**

(a) Cumulative daily food intake of control mice ( $n = 7/\text{group}$ ). M-3 had no effect on body weight (b), insulin sensitivity (c) or serum leptin and insulin levels (d) compared to vehicle in RCD control mice ( $n = 7/\text{group}$ ). (e,f) Glucose tolerance (with AUC) after 14 days and fasted blood glucose after 24 days, M-3 vs vehicle in control mice ( $n = 7/\text{group}$ ). Data are means  $\pm$  SEM. \*  $P < 0.05$  by repeated measures ANOVA with Sidak's multiple comparisons test (a,b,c,e) or 2-tailed unpaired Student's t-test (d,f and AUC in e).

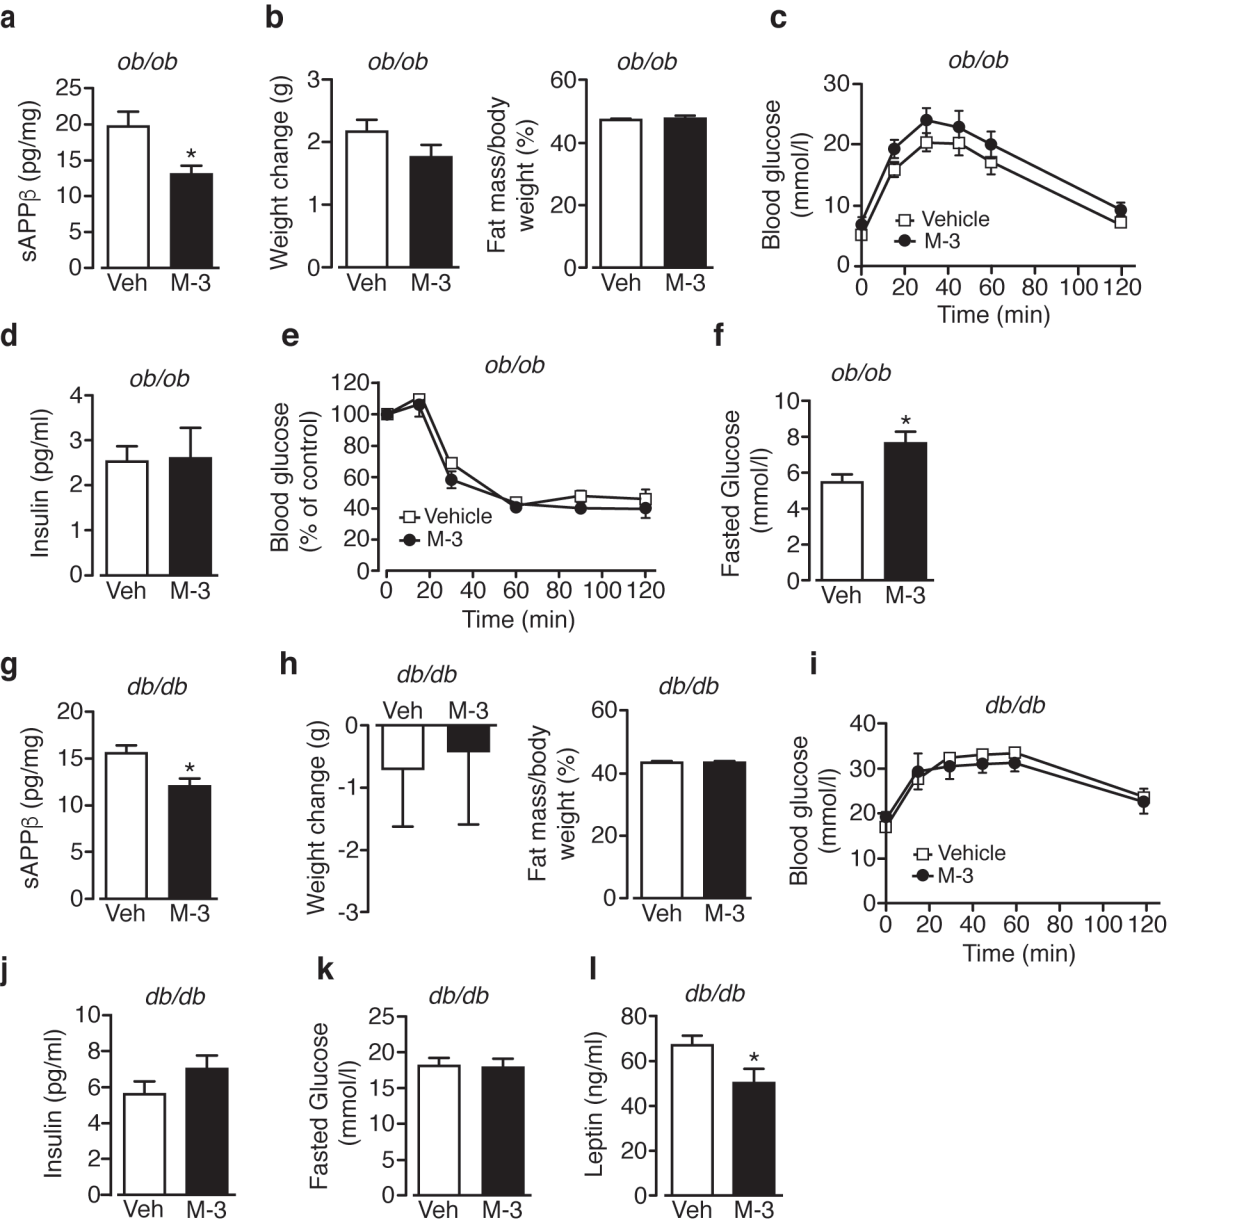

**Supplementary Figure 7. M-3 has no effect on fat or glucose homeostasis in *ob/ob* or *db/db* mice.**

(a) BMH Bace1 activity (sAPP $\beta$  levels) in sc vehicle ( $n = 8$ ) or M-3 ( $n = 6$ ) treated *ob/ob* mice. (b) Actual body weight change and % fat mass in *ob/ob* mice sc treated with vehicle ( $n = 11$ ) or M-3 ( $n = 10$ ). Glucose tolerance (c), fasted serum insulin (d), insulin sensitivity (e) and fasted blood glucose (f) of *ob/ob* mice sc treated with vehicle or M-3 ( $n = 10 - 11$ /group). (g) BMH Bace1 activity (sAPP $\beta$  levels) in sc vehicle ( $n = 5$ ) or M-3 ( $n = 4$ ) treated *db/db* mice. (h) Actual body weight change and % fat mass in *db/db* mice sc treated with vehicle ( $n = 9$ ) or M-3 ( $n = 8$ ). Glucose tolerance (i), fasted serum insulin (j), fasted blood glucose (k) and plasma leptin (l) levels of *db/db* mice sc treated with vehicle or M-3 ( $n = 8 - 10$ /group). Data are means  $\pm$  SEM. \*  $P < 0.05$  by 2-tailed unpaired Student's t-test (a,b,d,f,g,h,j,k,l) or repeated measures ANOVA with Didak's multiple comparisons test (c,e,i).

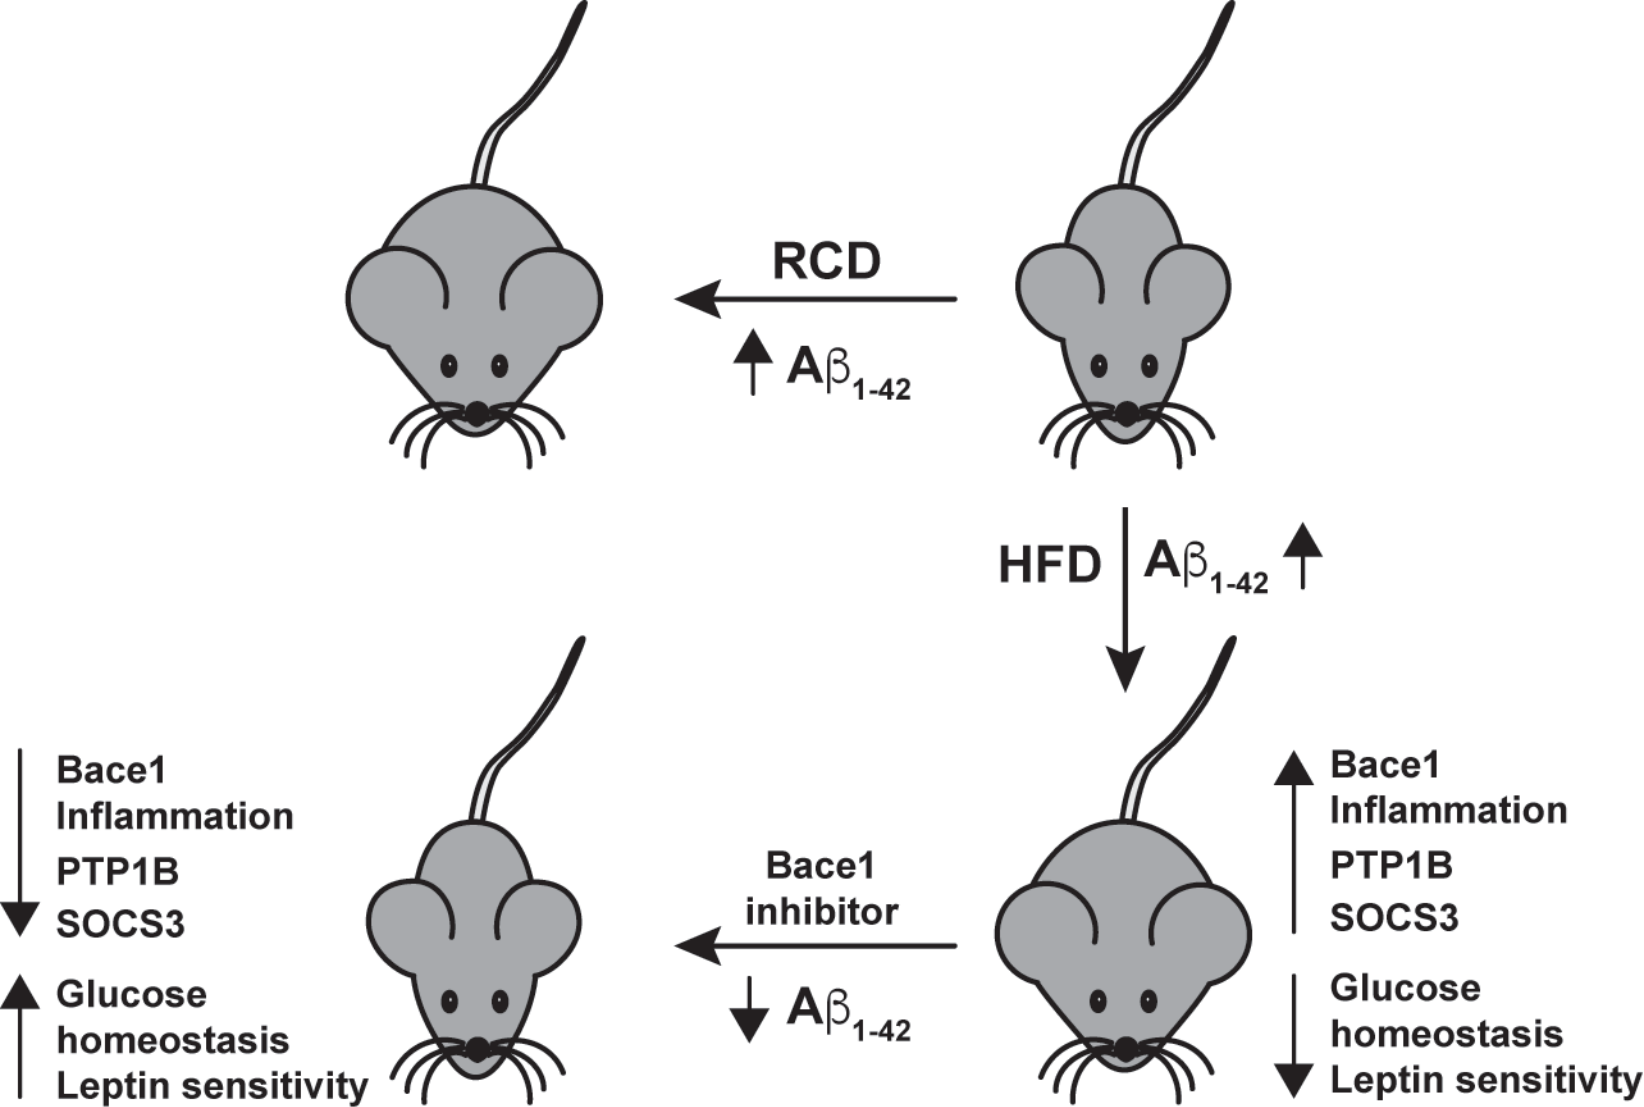

**Supplementary Figure 8: Model showing how altered central  $A\beta_{1-42}$  levels are related to Bace1 activity and to changes in hypothalamic inflammation, regulation of hypothalamic leptin sensitivity, body weight and glucose homeostasis.**

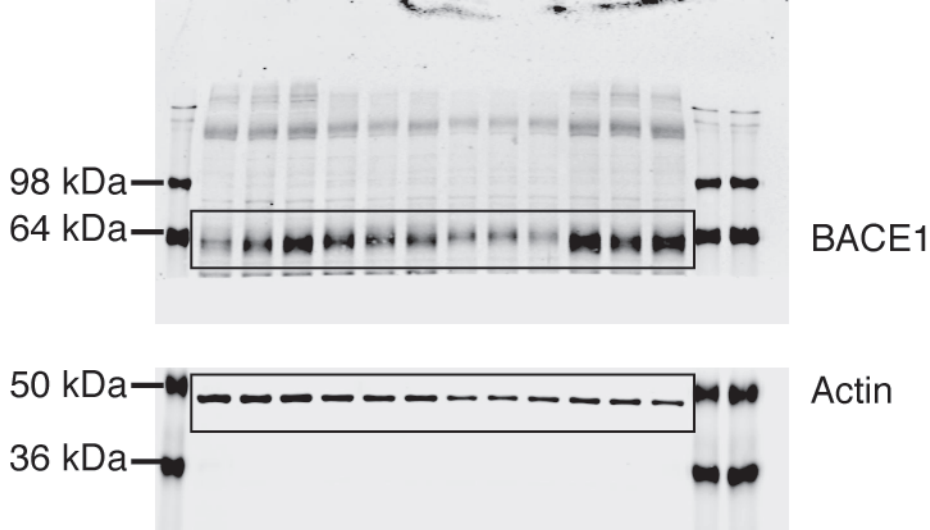

**Supplementary Figure 9. Immunoblots that illustrate the presence of Bace1 in mouse brain regions.** These are uncropped immunoblot images corresponding to data shown in Figure 1b.

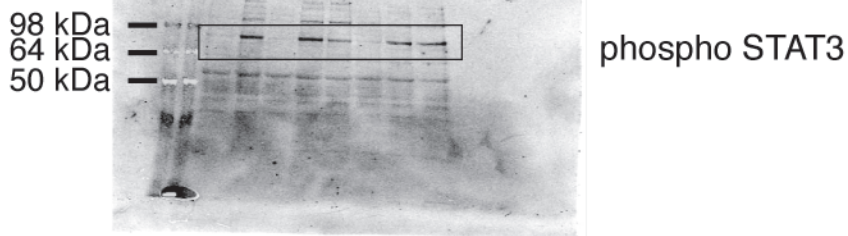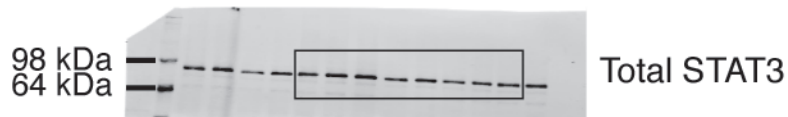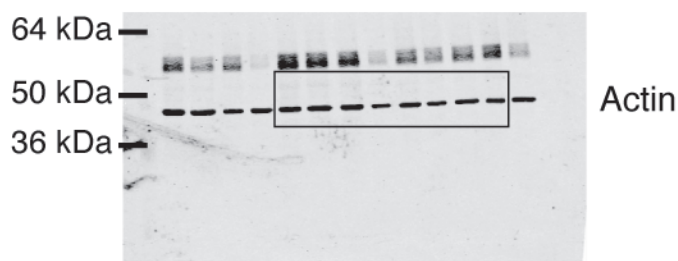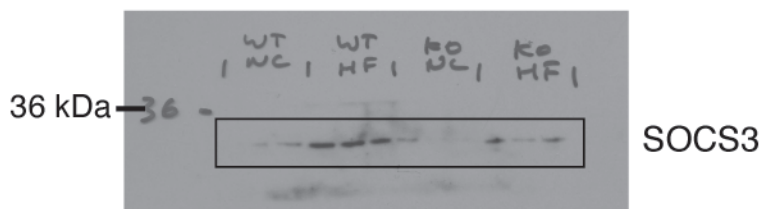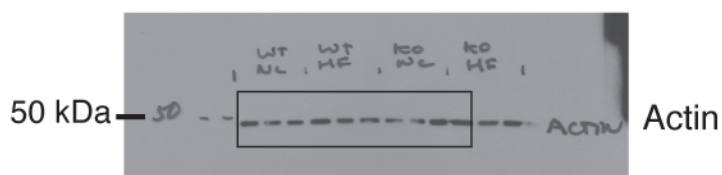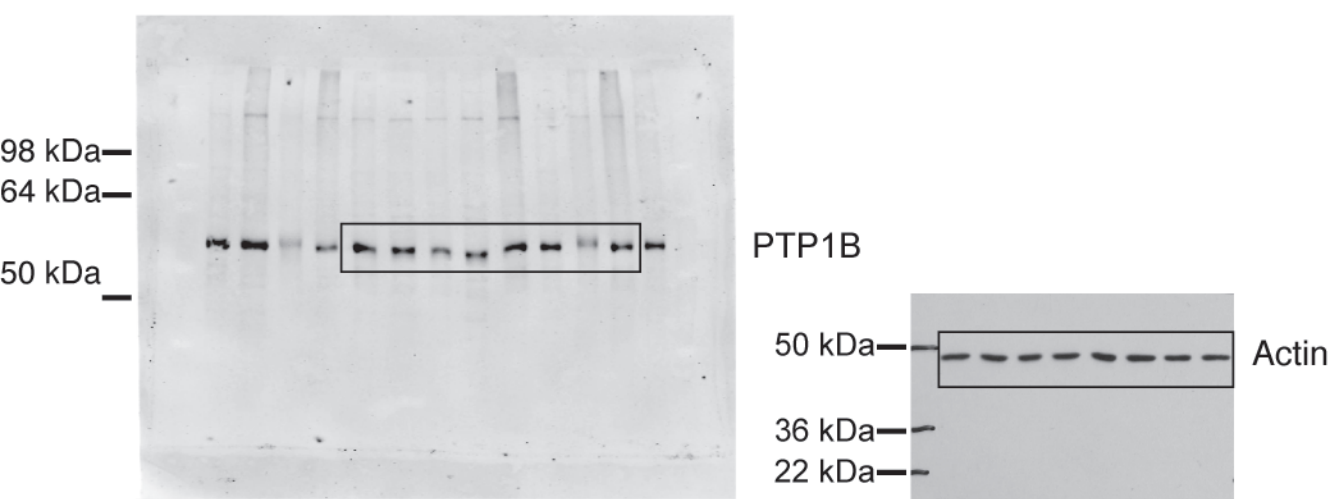

**Supplementary Figure 10. Immunoblots that illustrate how the absence of *Bace1* alters p-STAT3, SOCS3 and PTP1B levels in response to leptin and/or diet.** These are uncropped immunoblot images corresponding to data shown in Figures 3a, 3g and 3h, respectively. The PTP1B antibody has been characterised previously [Thompson D, Morrice N, Grant L, Le Sommer S, Lees EK, Mody N, Wilson HM, Delibegovic M. Clin Sci (Lond). 2017;131(20):2489-2501]

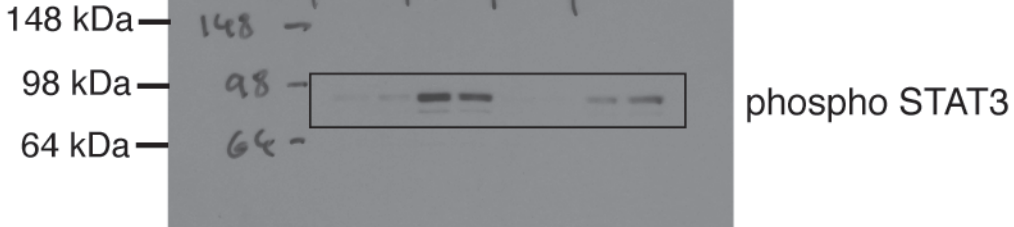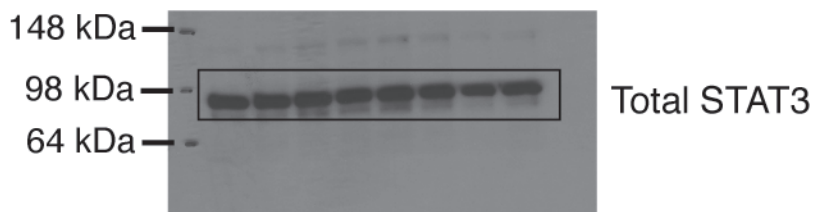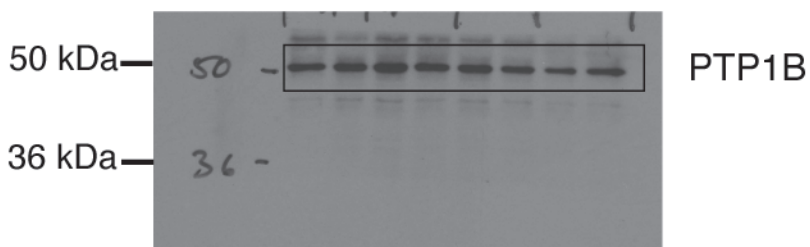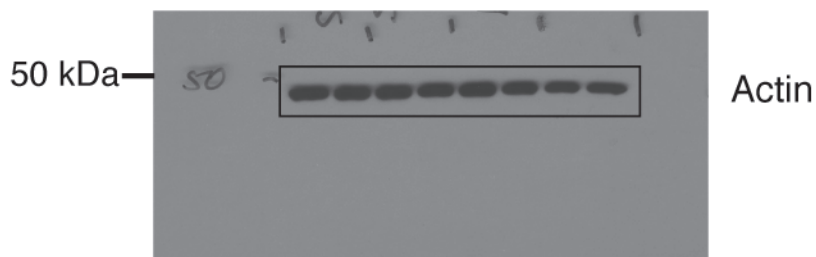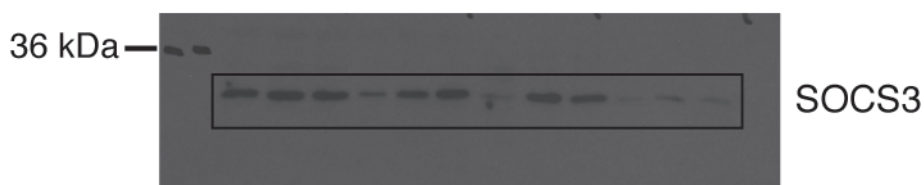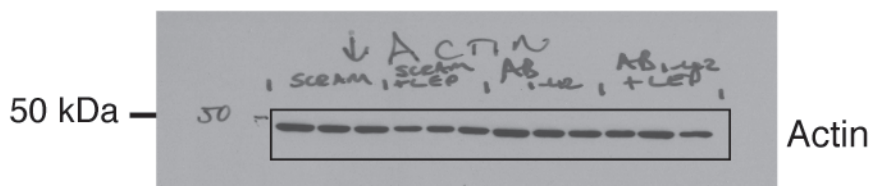

**Supplementary Figure 11. Immunoblots that illustrate how icv  $A\beta_{1-42}$  infusion alters p-STAT3, PTP1B and SOCS3 levels in response to leptin.** These are uncropped immunoblot images corresponding to data shown in Figures 7f and 7i, respectively..

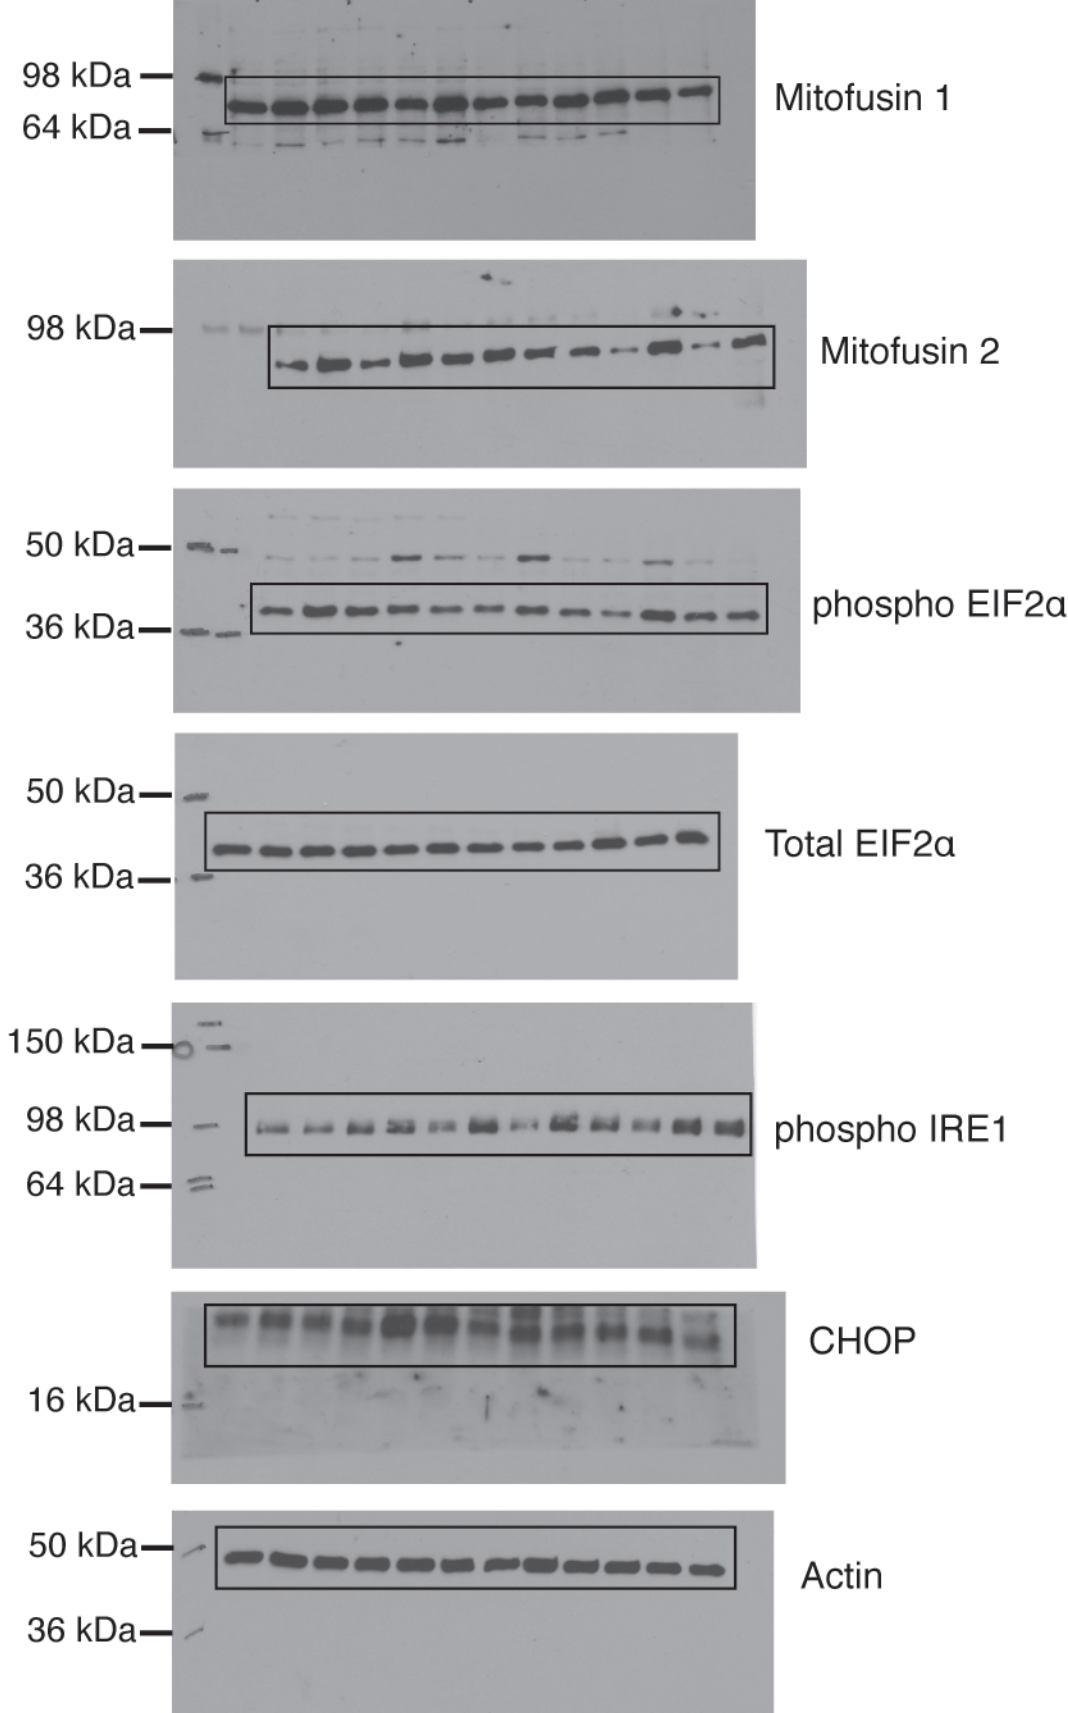

**Supplementary Figure 12. Immunoblots that illustrate the lack of effect of loss of Bace1 on hypothalamic stress markers.** These are uncropped immunoblot images corresponding to data shown in Supplementary Figure 3a.
